# Supplementary material for: Protective Effects of Astodrimer Sodium 1% Nasal Spray Formulation against SARS-CoV-2 Nasal Challenge in K18-hACE2 Mice
Source: MDPI journal article supplement (doi:10.3390/v13081656), 2021-08-20
Supplement: s1 [file s1]

Supplementary Materials

# Protective Effects of Astodimer Sodium 1% Nasal Spray Formulation Against SARS-CoV-2 Nasal Challenge in K18-hACE2 Mice

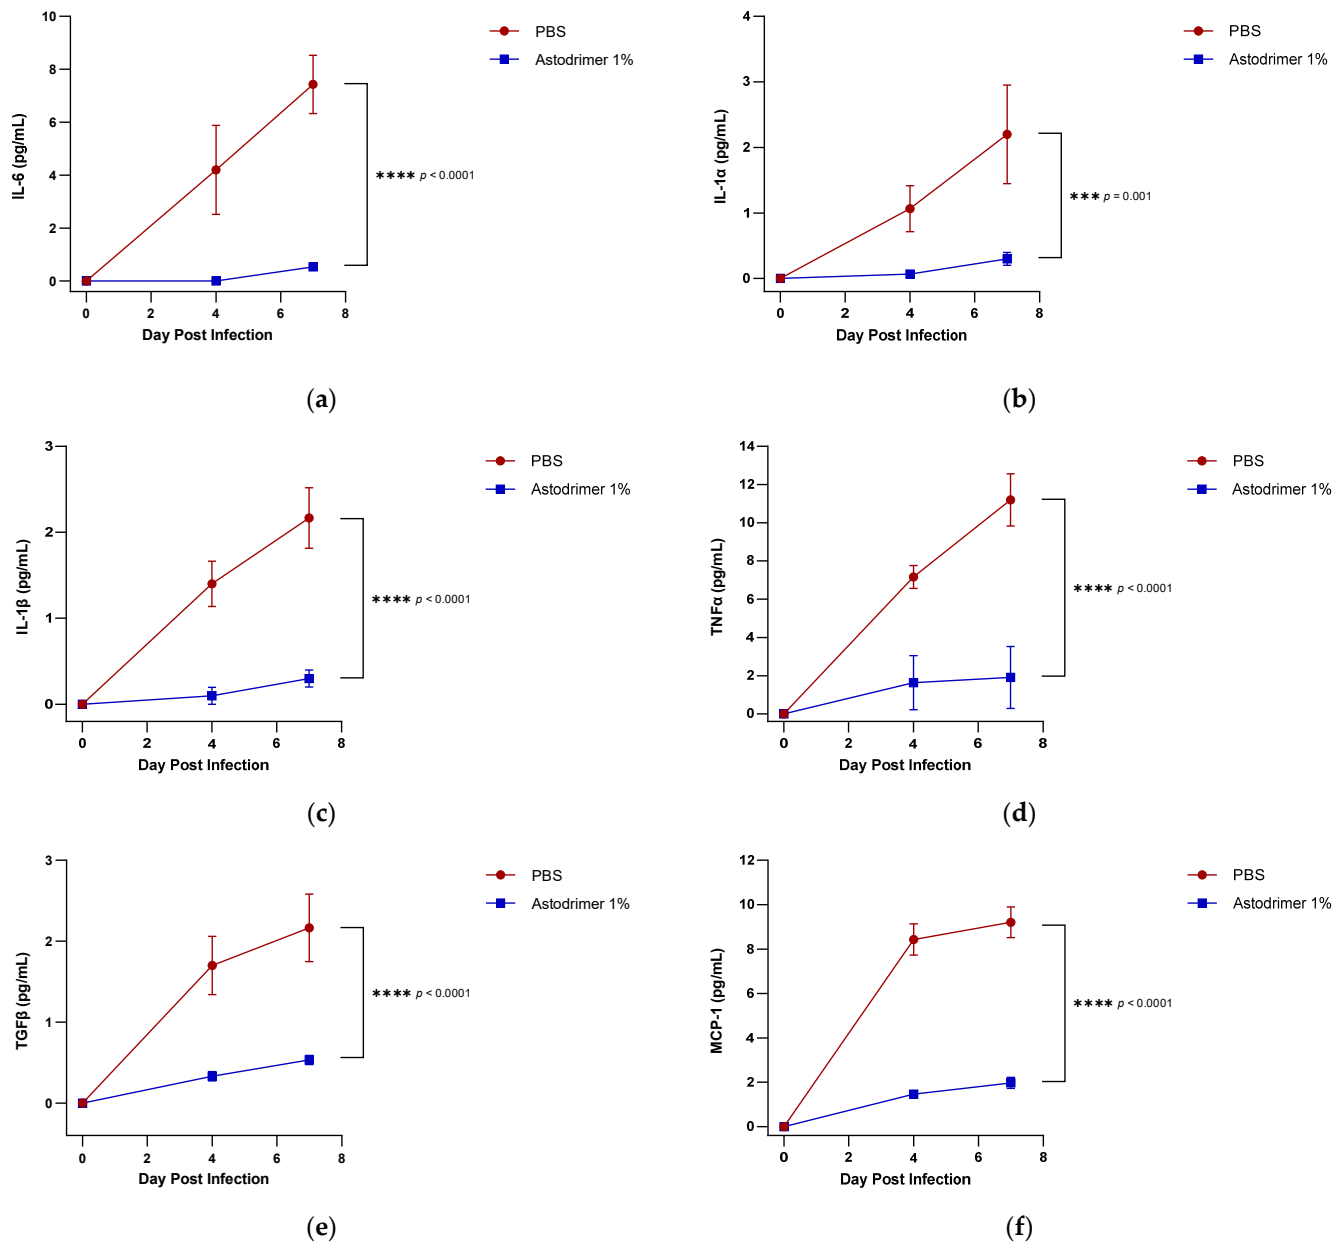

**Figure S1.** A seven-day time course of amount of cytokine/chemokine (pg/mL) in serum of SARS-CoV-2 (USA-WA1/2020) infected K18-hACE2 mice treated with PBS (Group 2.1) or astodimer sodium 1% nasal spray formulation (Group 2.2) via intranasal and intratracheal administration: (a) IL-6 (b) IL-1 $\alpha$  (c) IL-1 $\beta$  (d) TNF $\alpha$  (e) TGF $\beta$  (f) MCP-1. Points and error bars represent means  $\pm$  SD.

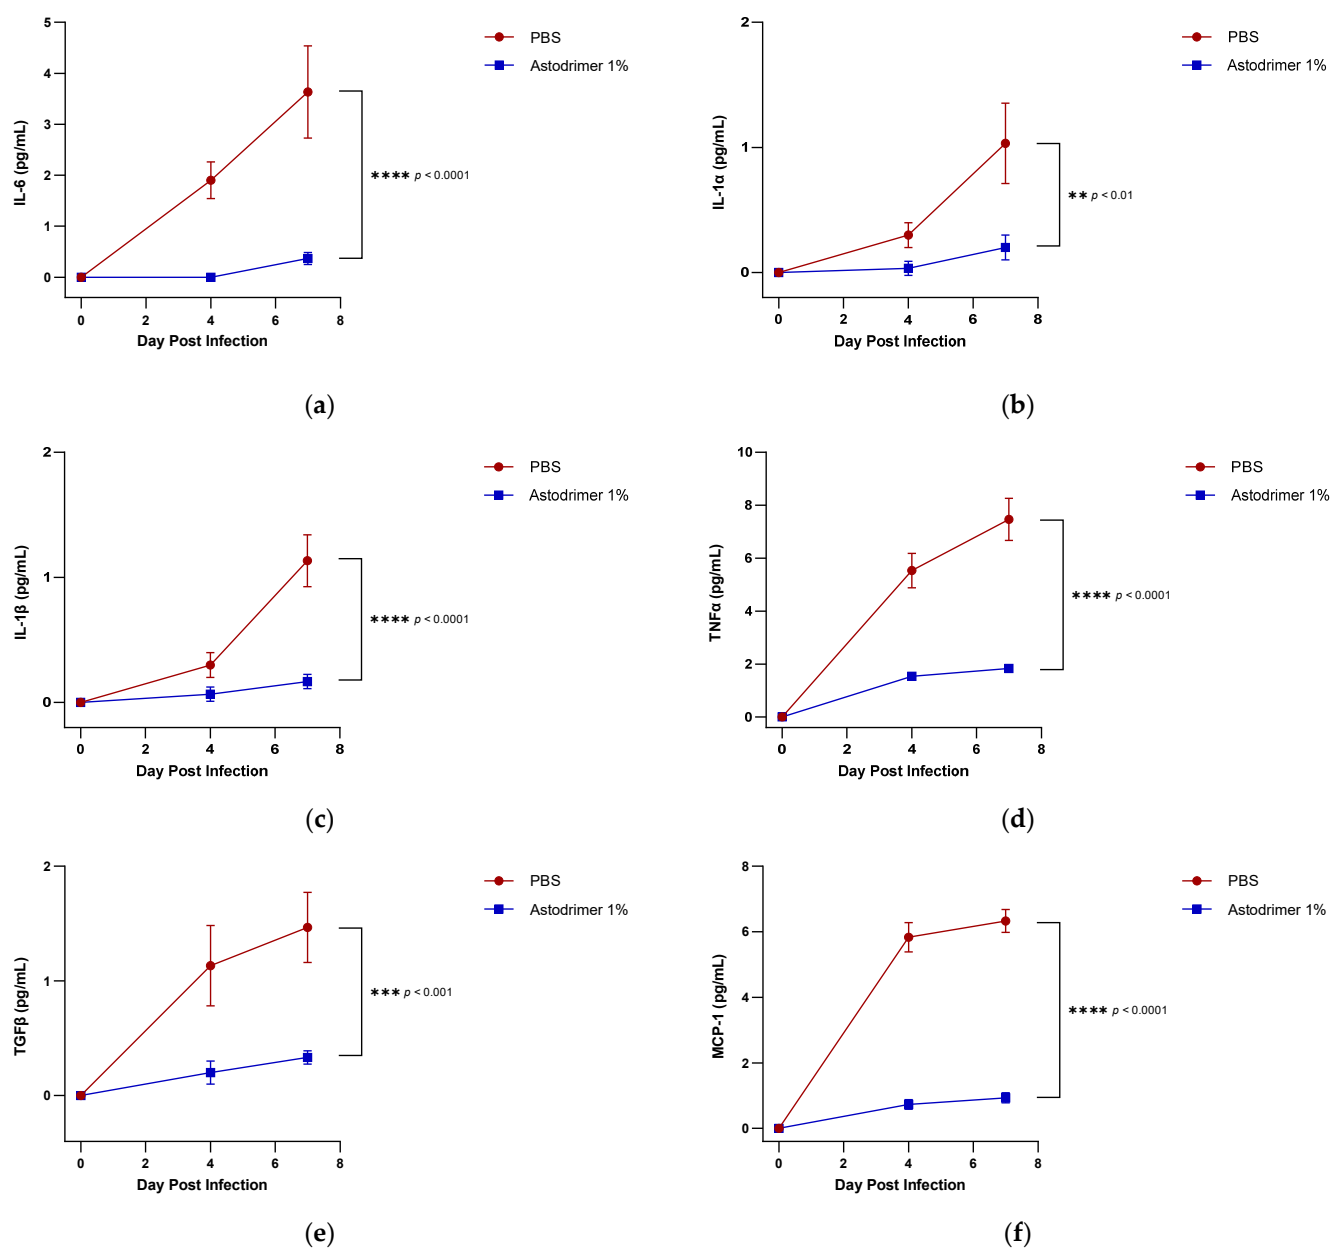

**Figure S2.** A seven-day time course of amount of cytokine/chemokine (pg/mL) in serum of in K18-hACE2 mice infected with SARS-CoV-2 (USA-WA1/2020) inoculum incubated with PBS (Group 3.1) or astodimer sodium 1% nasal spray (Group 3.2) for 60 minutes prior to neutralisation procedure – virucidal evaluation: (a) IL-6 (b) IL-1 $\alpha$  (c) IL-1 $\beta$  (d) TNF $\alpha$  (e) TGF $\beta$  (f) MCP-1. Points and error bars represent means  $\pm$  SD.

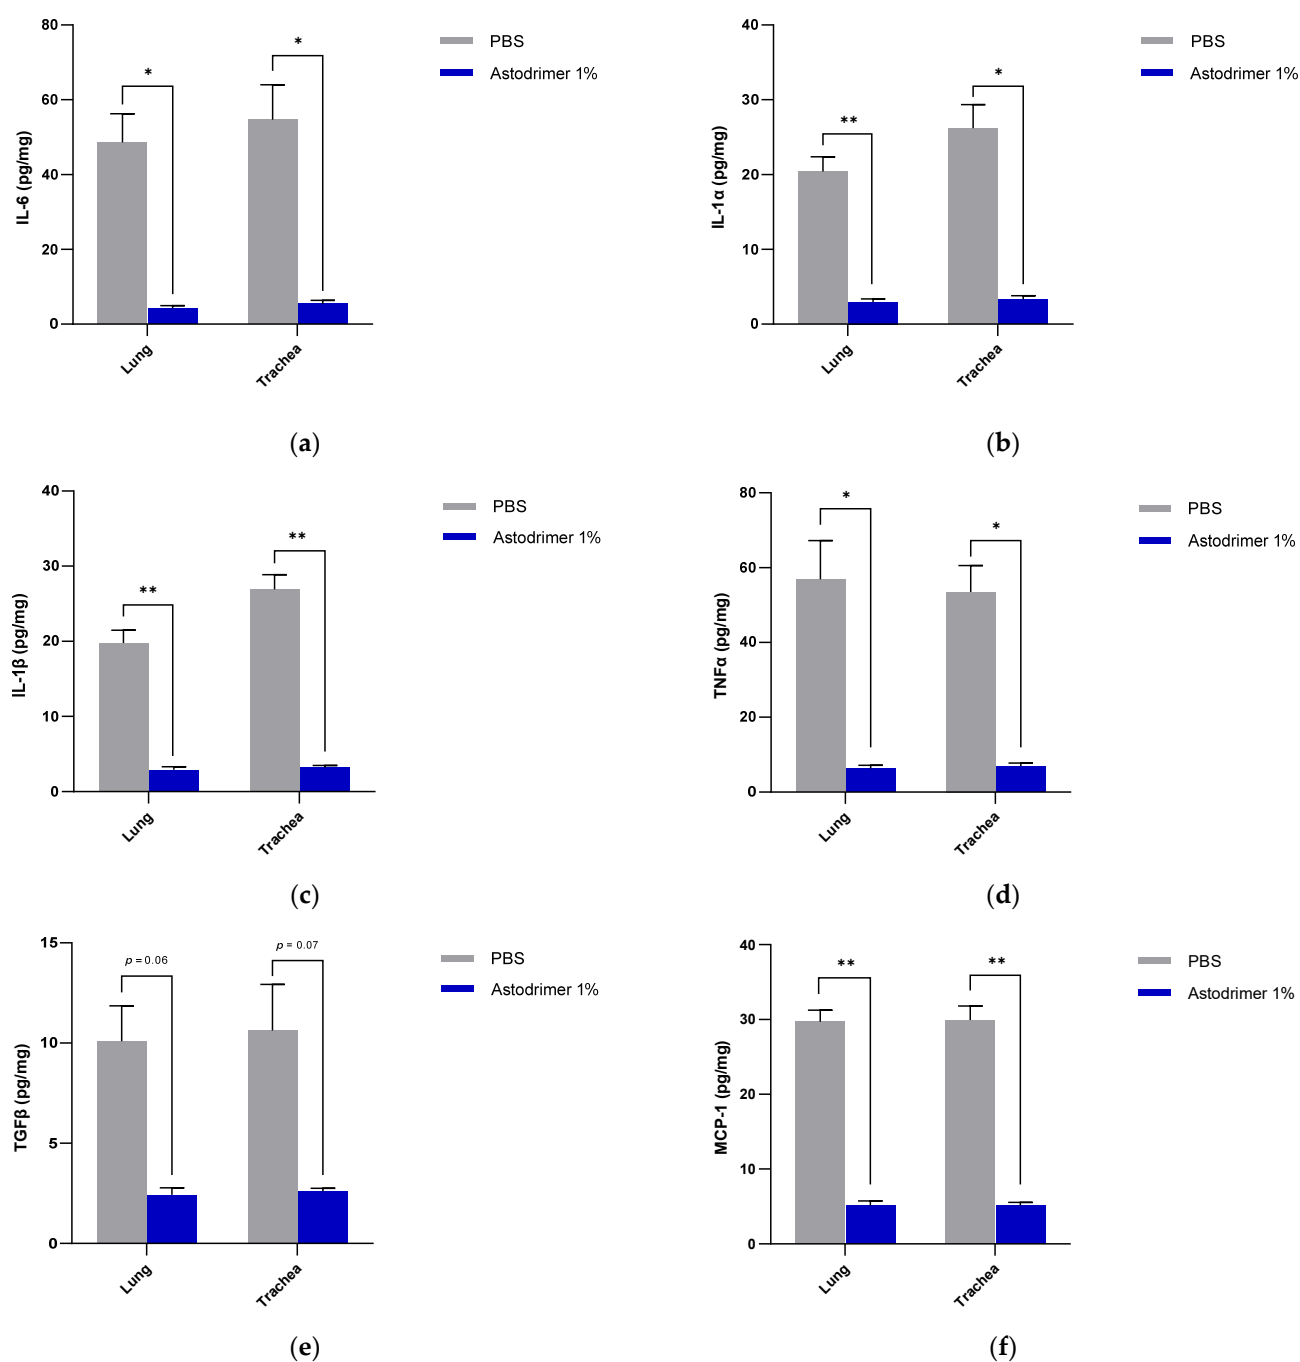

**Figure S3.** Amount of cytokine/chemokine in lung and trachea tissue homogenates from SARS-CoV-2 (USA-WA1/2020) infected K18-hACE2 mice treated with PBS (Group 1.1) or astodimer sodium 1% nasal spray (Group 1.2) formulation via intranasal administration: (a) IL-6 (b) IL-1 $\alpha$  (c) IL-1 $\beta$  (d) TNF $\alpha$  (e) TGF $\beta$  (f) MCP-1. Columns and error bars represent means  $\pm$  SEM. \*  $p < 0.05$ , \*\*  $p < 0.01$ , paired t-tests.

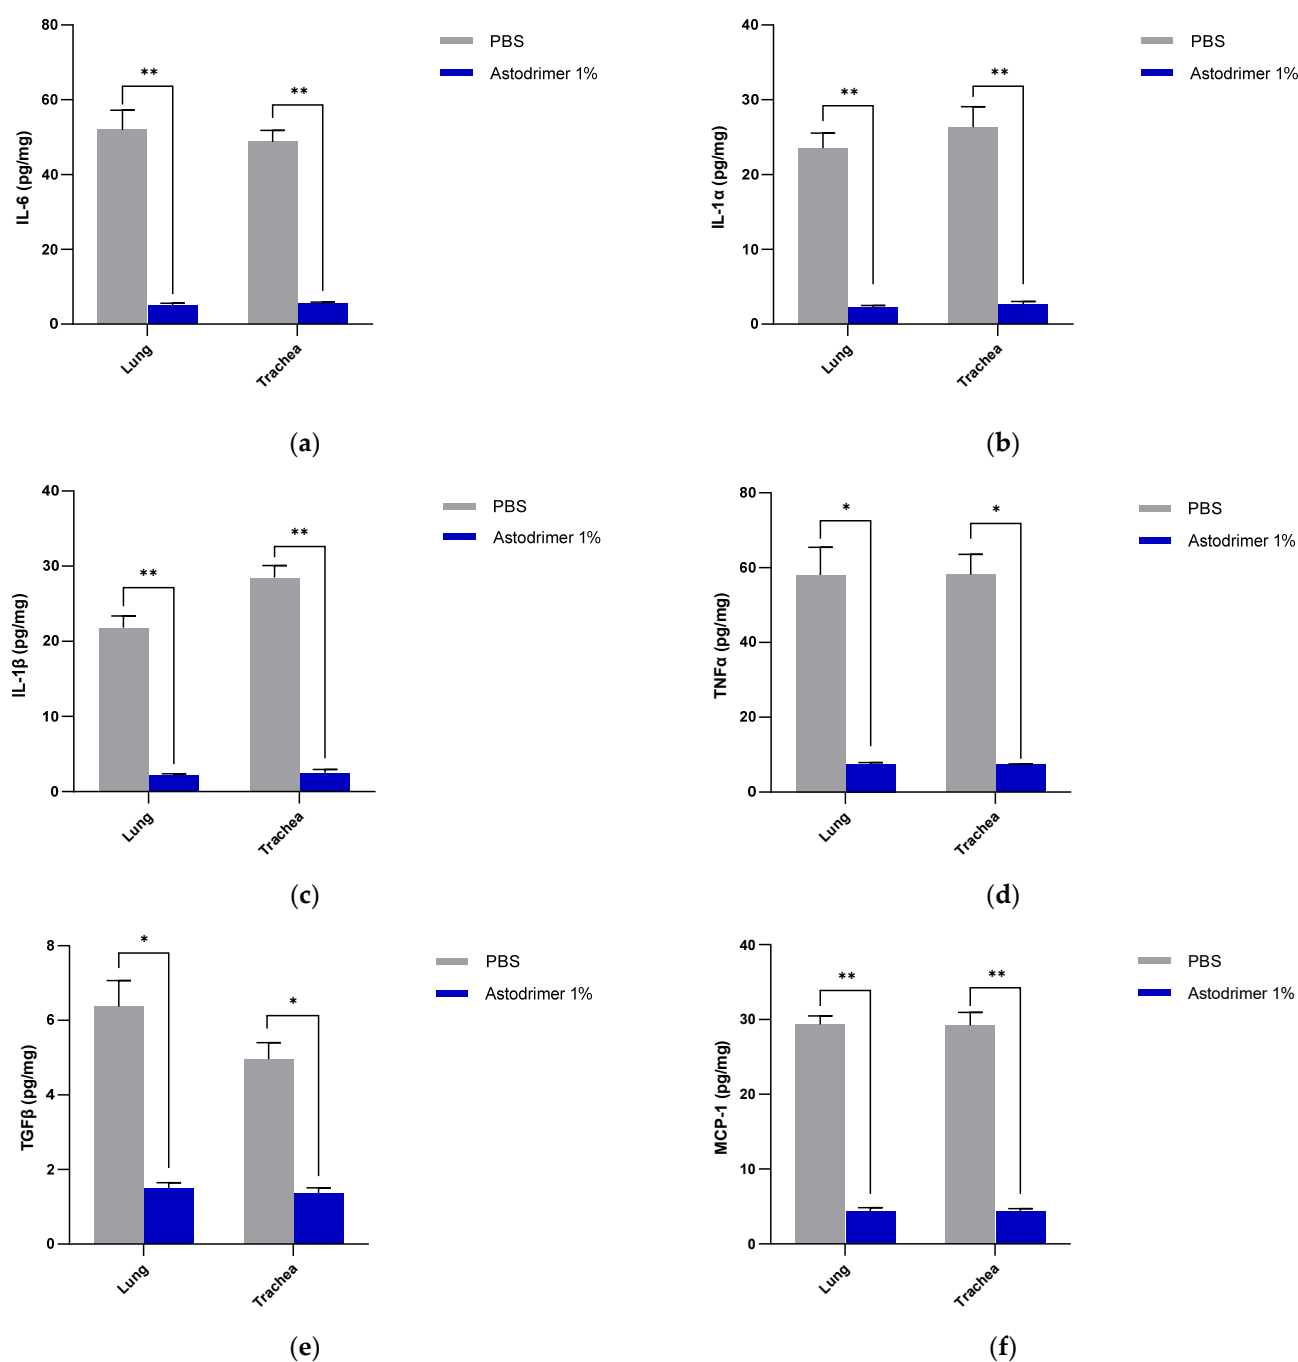

**Figure S4.** Amount of cytokine/chemokine in lung and trachea tissue homogenates from SARS-CoV-2 (USA-WA1/2020) infected K18-hACE2 mice treated with PBS (Group 2.1) or astodimer sodium 1% nasal spray (Group 2.2) formulation via intranasal and intratracheal administration: (a) IL-6 (b) IL-1 $\alpha$  (c) IL-1 $\beta$  (d) TNF $\alpha$  (e) TGF $\beta$  (f) MCP-1. Columns and error bars represent means  $\pm$  SEM. \*  $p < 0.05$ , \*\*  $p < 0.01$ , paired t-tests.
